# Supplementary material for: Influence of Dietary Habits and Mediterranean Diet Adherence on Sleep Quality during Pregnancy. The GESTAFIT Project
Source: MDPI journal article supplement (doi:10.3390/nu12113569), 2020-11-20
Supplement: s1 [file s1]

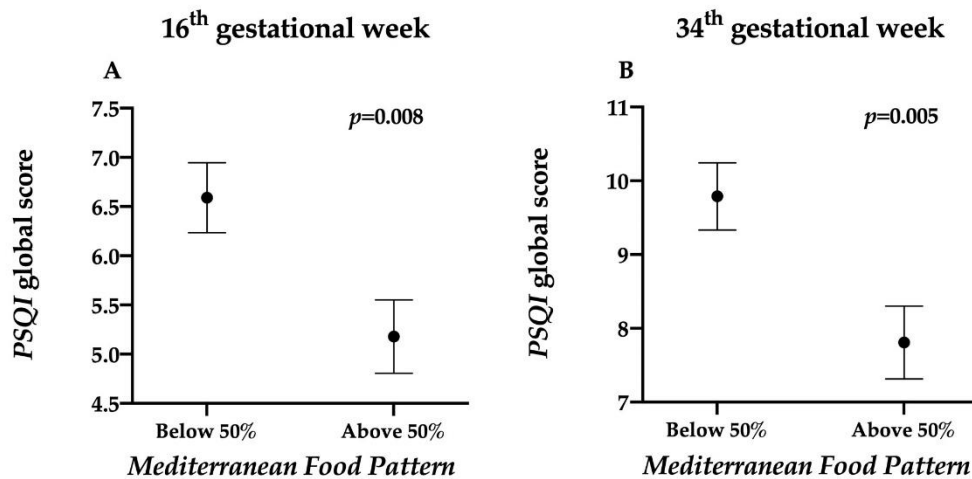

**Supplementary Figure S1. Pittsburgh Sleep Quality Index global score by Mediterranean Food Pattern adherence.** Dots represent mean and bars standard error. PSQI, Pittsburgh Sleep Quality Index. (A) Pittsburgh Sleep Quality Index global score by low vs. high Mediterranean Food Pattern at the 16th gestational week. (B) Pittsburgh Sleep Quality Index global score by low vs. high Mediterranean Food Pattern at the 34th gestational week.

**Supplementary table S1.** Differences in the dietary habits, the Mediterranean Food Pattern and the Pittsburgh Sleep Quality Index global score of pregnant women by gestational week (16th versus 34th gestational weeks) ( $n = 117$ ).

|                                                                                  | 16th week of<br>gestation | 34th week of<br>gestation | <i>p</i> |
|----------------------------------------------------------------------------------|---------------------------|---------------------------|----------|
| <b>Food frequency</b>                                                            |                           |                           |          |
| Whole-grain cereals (s/week)                                                     | 4.9 (5.3)                 | 5.6 (6.3)                 | 0.101    |
| Potatoes (s/week)                                                                | 2.3 (1.2)                 | 2.3 (1.5)                 | 1.000    |
| Fruits (s/day)                                                                   | 2.1 (1.1)                 | 2.4 (1.2)                 | 0.010    |
| Vegetables (s/day)                                                               | 3.6 (1.7)                 | 3.8 (1.7)                 | 0.014    |
| Pulses (s/week)                                                                  | 2.6 (1.1)                 | 2.6 (1.1)                 | 0.394    |
| Fish (s/week)                                                                    | 4.9 (2.3)                 | 5.3 (2.4)                 | 0.112    |
| Red meat and subproducts (s/week)                                                | 5.4 (3.4)                 | 5.7 (3.8)                 | 0.340    |
| Poultry (s/week)                                                                 | 2.6 (1.2)                 | 2.6 (1.3)                 | 0.862    |
| Whole dairy products (s/week)                                                    | 2.9 (3.9)                 | 4.0 (1.8)                 | 0.044    |
| Olive oil (s/week)                                                               | 13.9 (11.6)               | 13.3 (7.9)                | 0.888    |
| Sweets (s/week)                                                                  | 8.9 (6.4)                 | 9.5 (6.9)                 | 0.195    |
| Nuts (s/week)                                                                    | 5.2 (5.3)                 | 5.5 (5.4)                 | 0.487    |
| Mediterranean Food Pattern (4-35)                                                | 21.0 (5.0)                | 21.1 (5.4)                | 0.847    |
| Pittsburgh Sleep Quality Index global score (0-21) <sup>a</sup><br>( $n = 116$ ) | 6.20 (3.3)                | 8.76 (3.8)                | <0.001   |

<sup>a</sup>A higher score means worse sleep quality. Data shown as mean (standard deviation); s—servings.

**Supplementary Table S2.** Association between Mediterranean Food Pattern and Mediterranean diet components with the Pittsburgh Sleep Quality Index global score at the 16th gestational week and 34th gestational week according to pre-pregnancy body mass index categorization.

|                                          | Pre-pregnancy normal-weight                                           | Pre-pregnancy overweight or obese                                     | Pre-pregnancy normal-weight                                           | Pre-pregnancy overweight or obese                                     |
|------------------------------------------|-----------------------------------------------------------------------|-----------------------------------------------------------------------|-----------------------------------------------------------------------|-----------------------------------------------------------------------|
| Food groups                              | PSQI global score <sup>a</sup><br>(16th gestational week)<br>(n = 87) | PSQI global score <sup>a</sup><br>(16th gestational week)<br>(n = 49) | PSQI global score <sup>a</sup><br>(34th gestational week)<br>(n = 78) | PSQI global score <sup>a</sup><br>(34th gestational week)<br>(n = 34) |
| <i>Whole-grain cereals (s/week)</i>      | 0.088                                                                 | -0.202                                                                | -0.083                                                                | -0.204                                                                |
| <i>Potatoes (s/week)</i>                 | -0.004                                                                | -0.058                                                                | 0.101                                                                 | 0.030                                                                 |
| <i>Fruits (s/day)</i>                    | -0.269*                                                               | -0.083                                                                | -0.074                                                                | -0.232                                                                |
| <i>Vegetables (s/day)</i>                | 0.012                                                                 | -0.108                                                                | -0.163                                                                | 0.036                                                                 |
| <i>Pulses (s/week)</i>                   | 0.050                                                                 | 0.188                                                                 | -0.044                                                                | 0.161                                                                 |
| <i>Fish (s/week)</i>                     | 0.056                                                                 | -0.016                                                                | -0.112                                                                | -0.273                                                                |
| <i>Red meat and subproducts (s/week)</i> | 0.080                                                                 | 0.222                                                                 | 0.096                                                                 | 0.250                                                                 |
| <i>Poultry (s/week)</i>                  | 0.162                                                                 | -0.028                                                                | 0.075                                                                 | 0.119                                                                 |
| <i>Whole dairy products (s/week)</i>     | -0.062                                                                | 0.010                                                                 | -0.152                                                                | 0.030                                                                 |
| <i>Skimmed dairy products (s/week)</i>   | 0.138                                                                 | -0.211                                                                | -0.020                                                                | -0.243                                                                |
| <i>Olive oil (s/week)</i>                | 0.006                                                                 | -0.401**                                                              | -0.260*                                                               | -0.198                                                                |
| <i>Nuts (s/week)</i>                     | -0.009                                                                | -0.084                                                                | -0.105                                                                | -0.191                                                                |
| <i>Sweets (s/week)</i>                   | 0.064                                                                 | -0.012                                                                | 0.057                                                                 | 0.181                                                                 |
| <i>Mediterranean Food Pattern (4-35)</i> | -0.122                                                                | -0.207                                                                | -0.284*                                                               | -0.362*                                                               |

<sup>a</sup>A higher score means worse sleep quality. PSQI—Pittsburgh Sleep Quality Index; s—servings. \* $p < 0.05$ ; \*\* $p < 0.01$ .

**Supplementary Table S3.** Association between Mediterranean Food Pattern and Mediterranean diet components with the Pittsburgh Sleep Quality Index global score at the 16th gestational week and 34th gestational week for the control group and the intervention groups.

| Food groups                              | Control group                                                            | Control group                                                            | Intervention group                                                       |
|------------------------------------------|--------------------------------------------------------------------------|--------------------------------------------------------------------------|--------------------------------------------------------------------------|
|                                          | PSQI global score <sup>a</sup><br>(16th gestational<br>week)<br>(n = 78) | PSQI global score <sup>a</sup><br>(34th gestational<br>week)<br>(n = 52) | PSQI global score <sup>a</sup><br>(34th gestational<br>week)<br>(n = 66) |
| <i>Whole-grain cereals (s/week)</i>      | -0.025                                                                   | -0.107                                                                   | -0.189                                                                   |
| <i>Potatoes (s/week)</i>                 | -0.073                                                                   | 0.234                                                                    | -0.028                                                                   |
| <i>Fruits (s/day)</i>                    | -0.292**                                                                 | -0.214                                                                   | -0.035                                                                   |
| <i>Vegetables (s/day)</i>                | -0.025                                                                   | -0.157                                                                   | -0.027                                                                   |
| <i>Pulses (s/week)</i>                   | 0.096                                                                    | -0.027                                                                   | 0.089                                                                    |
| <i>Fish (s/week)</i>                     | -0.036                                                                   | -0.175                                                                   | -0.036                                                                   |
| <i>Red meat and subproducts (s/week)</i> | 0.142                                                                    | 0.169                                                                    | 0.236                                                                    |
| <i>Poultry (s/week)</i>                  | 0.096                                                                    | 0.139                                                                    | 0.059                                                                    |
| <i>Whole dairy products (s/week)</i>     | -0.159                                                                   | -0.099                                                                   | -0.005                                                                   |
| <i>Skimmed dairy products (s/week)</i>   | 0.078                                                                    | -0.035                                                                   | -0.134                                                                   |
| <i>Olive oil (s/week)</i>                | -0.281*                                                                  | -0.367**                                                                 | -0.006                                                                   |
| <i>Nuts (s/week)</i>                     | -0.208                                                                   | -0.225                                                                   | -0.085                                                                   |
| <i>Sweets (s/week)</i>                   | -0.009                                                                   | 0.165                                                                    | 0.118                                                                    |
| <i>Mediterranean Food Pattern (4-35)</i> | -0.240*                                                                  | -0.451**                                                                 | -0.150                                                                   |

<sup>a</sup>A higher score means worse sleep quality. PSQI—Pittsburgh Sleep Quality Index; s—servings. \*p<0.05; \*\*p<0.01.

**Supplementary Table S4.** Differences in the Pittsburgh Sleep Quality Index global score of pregnant women at the 34th gestational week by exercise intervention (control versus intervention).

|                                       | <b>Control group</b><br><b>(<i>n</i> = 52)</b> | <b>Intervention group</b><br><b>(<i>n</i> = 66)</b> | <b><i>p</i></b> |
|---------------------------------------|------------------------------------------------|-----------------------------------------------------|-----------------|
| PSQI global score (0-21) <sup>a</sup> | 8.96 (3.8)                                     | 8.73 (3.7)                                          | 0.726           |

<sup>a</sup>A higher score means worse sleep quality. PSQI—Pittsburgh Sleep Quality Index.
